# Supplementary material for: Investigation of the regeneration kinetics of organic dyes with pyridine ring anchoring groups by scanning electrochemical microscopy
Source: Royal Society of Chemistry journal article supplement (doi:10.1039/c4ra07908f), 2014-01-01
Supplement: c4ra07908f1.pdf [file c4ra07908f1.pdf]

## Supporting information

# Investigation of Regeneration Kinetics of Organic Dyes with Pyridine Ring Anchoring Group by Scanning Electrochemical Microscopy

Getachew Alemu, Jin Cui, Kun Cao, Junpeng Li, Yan Shen\* and Mingkui Wang\*

Wuhan National Laboratory for Optoelectronics, School of Optical and Electronic Information, Huazhong University of Science and Technology, 1037 Luoyu Road, Wuhan 430074 (P. R. China).

E-mail: [mingkui.wang@mail.hust.edu.cn](mailto:mingkui.wang@mail.hust.edu.cn), [ciac\\_sheny@mail.hust.edu.cn](mailto:ciac_sheny@mail.hust.edu.cn)

The diffusion flux from the solution bulk to the active electrode current is hindered by the insulating glass sheath and the presence of the sample. Normalized heterogeneous rate constant  $\kappa$  was extracted from experimental approach curves by fitting them with the model evaluated by Cornut and Lefrou.<sup>1-5</sup>

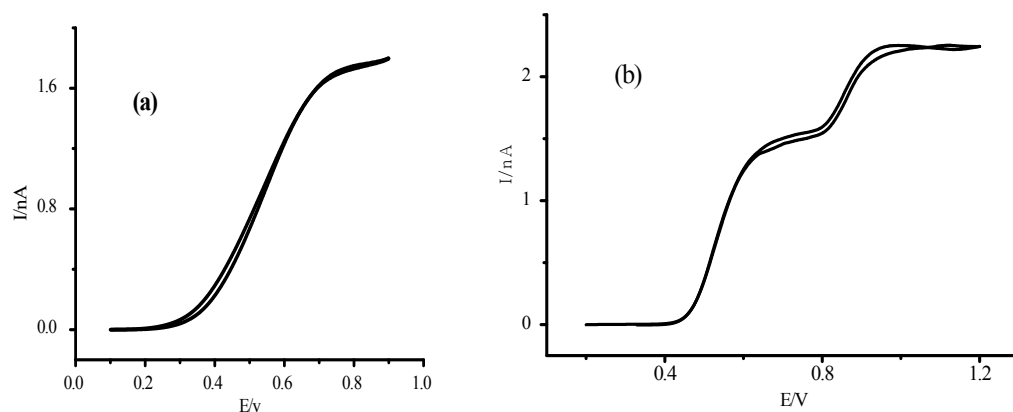

Fig.SI .1. Cyclic voltammogram of (a) 1mM T- (b) 1mM LiI +0.1M LiTFS in acetonitrile solution at a Pt UME scan rate  $0.05 \text{ V s}^{-1}$

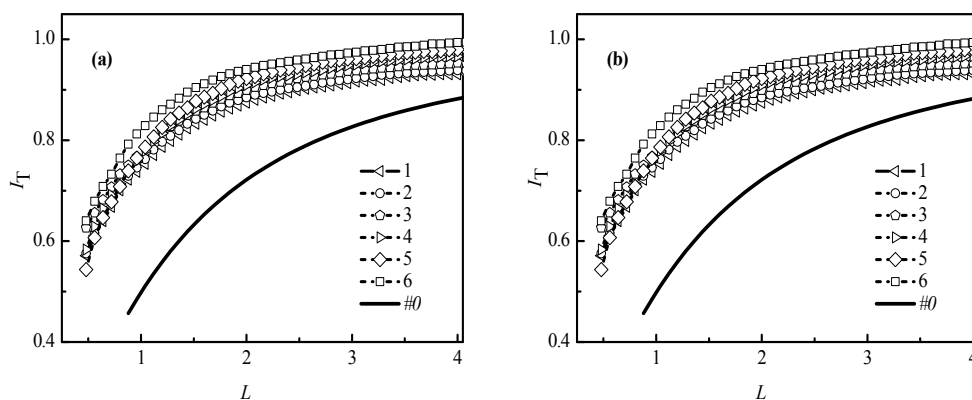

Fig. S2. (a) Normalized SECM feedback approach curves for the approach of a Pt disk UME towards a NiO/P1 film in the dark (curve #0) and under illumination by blue LED. Photon flux density of LED in  $10^{-9} \text{ mol cm}^{-2} \text{ s}^{-1}$  (1) 2.2, (2) 6.1, (3) 11.8, (4) 13.9, (5) 19.8, (6) 22.4. scan rate=  $0.05 \text{ V s}^{-1}$ ,  $E_T = 0.7 \text{ V}$ , electrolyte:  $1 \text{ mM I}^-$ . Heterogeneous rate constants  $k$  was obtained: (1) 0.009, (2) 0.013, (3) 0.025, (4) 0.036, (5) 0.05, (6) 0.099. And  $k_{\text{eff}}$  ( $10^{-3} \text{ cm s}^{-1}$ ): (1) 0.134, (2) 0.193, (3) 0.372, (4) 0.535, (5) 0.788, (6) 1.473. (b) Photon flux density of red LED in  $10^{-9} \text{ mol cm}^{-2} \text{ s}^{-1}$  (1) 4.19, (2) 6.81, (3) 9.44, (4) 12.06, (5) 13.11, (6) 14.68; the normalized rate constants  $k$ : (1) 0.0012, (2) 0.0021, (3) 0.0048, (4) 0.0076, (5) 0.0116, (6) 0.0167. And  $k_{\text{eff}}$  ( $10^{-3} \text{ cm s}^{-1}$ ): (1) 0.0431, (2) 0.531, (3) 0.0.621, (4) 0.709, (5) 0.733, (6) 0.804.

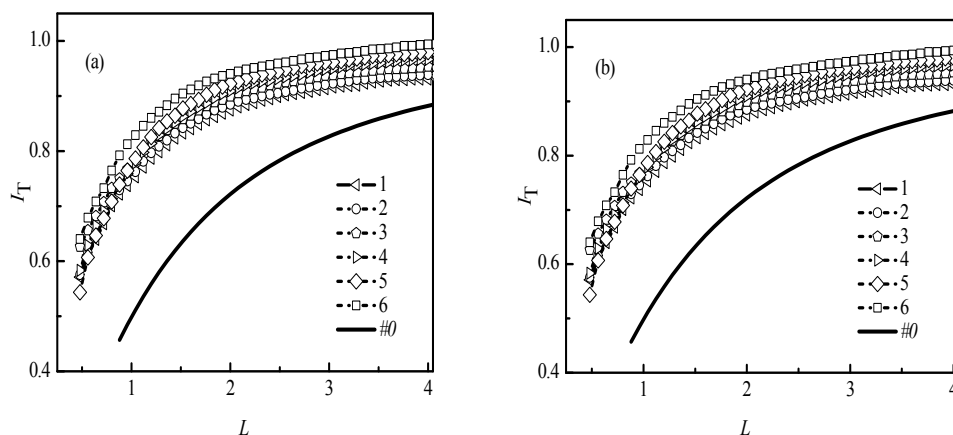

Fig. S3 (a) Normalized SECM feedback approach curves for the approach of a Pt disk UME towards a NiO/P1 film in the dark (curve #0) and under illumination by blue LED. Photon flux density of LED in  $J_{\text{hv}} \times 10^{-9} \text{ mol cm}^{-2} \text{ s}^{-1}$ : (1) 2.2, (2) 6.1, (3) 11.8, (4) 13.9, (5) 19.8, (6) 22.4; scan rate=  $0.05 \text{ V s}^{-1}$ ,  $E_T = 0.7 \text{ V}$ , electrolyte:  $1 \text{ mM I}^-$ . First order kinetics of mediator recycling using normalized rate constants  $k$ : (1) 0.0434, (2) 0.0683, (3) 0.0737, (4) 0.0835, (5) 0.0864, (6) 0.1298.  $k_{\text{eff}}$  ( $10^{-3} \text{ cm s}^{-1}$ ): (1) 0.468, (2) 0.737, (3) 0.795, (4) 0.901, (5) 0.933, (6) 1.469. (b) Photon flux density of red LED in  $J_{\text{hv}} \times 10^{-9} \text{ mol cm}^{-2} \text{ s}^{-1}$ : (1) 4.19, (2) 6.81, (3) 9.44, (4) 12.06, (5) 13.11, (6) 14.68. The normalized rate constants  $k$ : (1) 0.0399, (2) 0.0491, (3)

0.0575, (4) 0.0657, (5) 0.0679, (6) 0.0745.  $k_{\text{eff}}$  ( $10^{-3} \text{ cm s}^{-1}$ ): (1) 0.431, (2) 0.531, (3) 0.621, (4) 0.709, (5) 0.733, (6) 0.804.

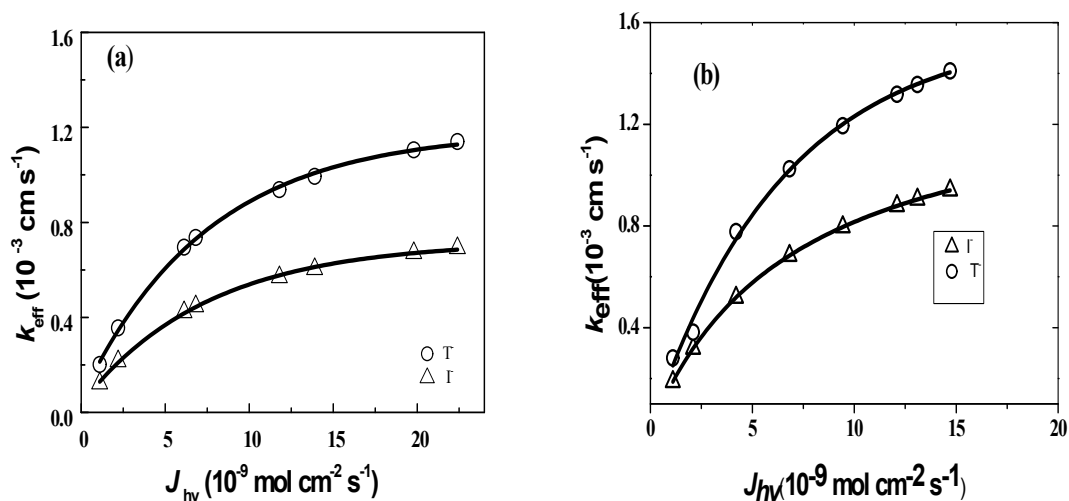

Fig. S4 Plots of experimental values of  $k_{\text{eff}}$  vs.  $J_{\text{hv}}$  for electrolytes (T<sup>-</sup>) (○) and (I<sup>-</sup>) (Δ) with (a) blue and (b) red LED.

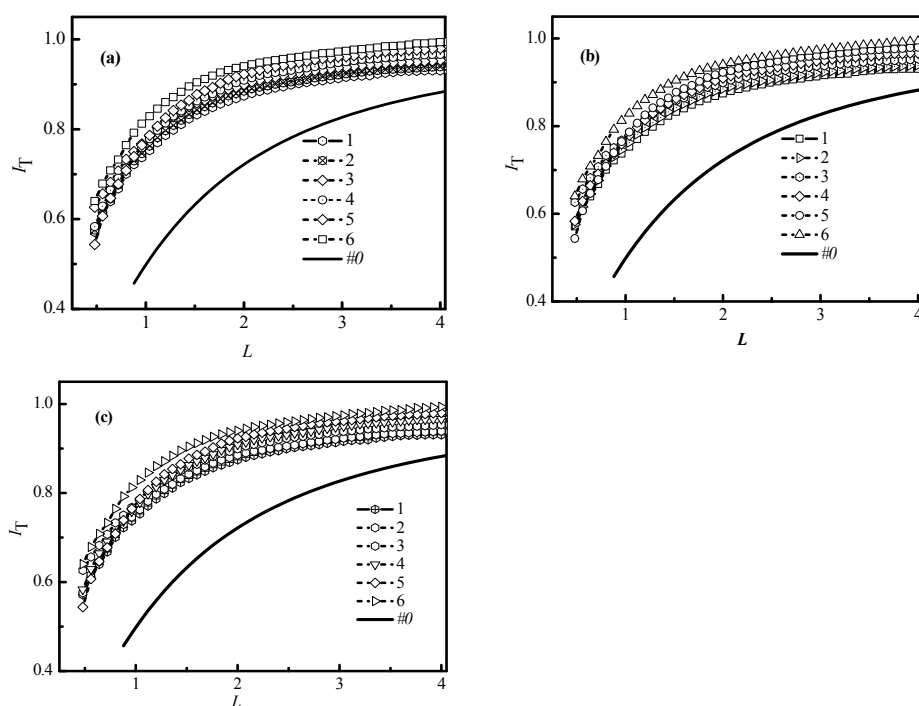

Fig. S5 (a) Normalized SECM feedback approach curves for the approach of a Pt disk UME towards a NiO/P1 film in the dark (curve #0) and under illumination by blue LED. Photon

flux density of LED in  $10^{-9}$  mol  $\text{cm}^{-2}$   $\text{s}^{-1}$ : (1) 2.2, (2) 6.1, (3) 11.8, (4) 13.9, (5) 19.8, (6) 22.4. scan rate= $0.05$  V  $\text{s}^{-1}$ ,  $E_T = 0.7$  V, electrolyte: 1 mM I. Solid lines are calculated curves for an approach of an UME towards an inert insulating surface (curve #0), and to samples with first order kinetics of mediator recycling using normalized rate constant  $k$ : (1) 0.0434, (2) 0.0683, (3) 0.0737, (4) 0.0835, (5) 0.0864, (6) 0.1298. And  $k_{\text{eff}}$  ( $10^{-3}$  cm  $\text{s}^{-1}$ ): (1) 0.2158, (2) 0.4222, (3) 0.4468, (4) 0.5694, (5) 0.6041 (6) 0.6712. (b) NiO/CW2 film in under illumination by blue LED normalized rate constants  $k$ : (1) 0.0978, (2) 0.0995, (3) 0.1043, (4) 0.1095, (5) 0.1145 (6) 0.1212. And  $k_{\text{eff}}$  ( $10^{-3}$  cm  $\text{s}^{-1}$ ): (1) 0.145, (2) 0.148, (3) 0.155, (4) 0.162 (5) 0.171 (6) 0.182. (c) NiO/CW1 film in the dark (curve #0) and under illumination by blue LED. Photon flux density of LED in  $10^{-9}$  mol  $\text{cm}^{-2}$   $\text{s}^{-1}$  normalized rate constants  $k$ : (1) 0.0621, (2) 0.0854 (3) 0.0894, (4) 0.0932, (5) 0.0973, (6) 0.1995. And  $k_{\text{eff}}$  ( $10^{-3}$  cm  $\text{s}^{-1}$ ): (1) 0.091, (2) 0.125, (3) 0.136 (4) 0.147, (5) 0.175, (6) 0.229.

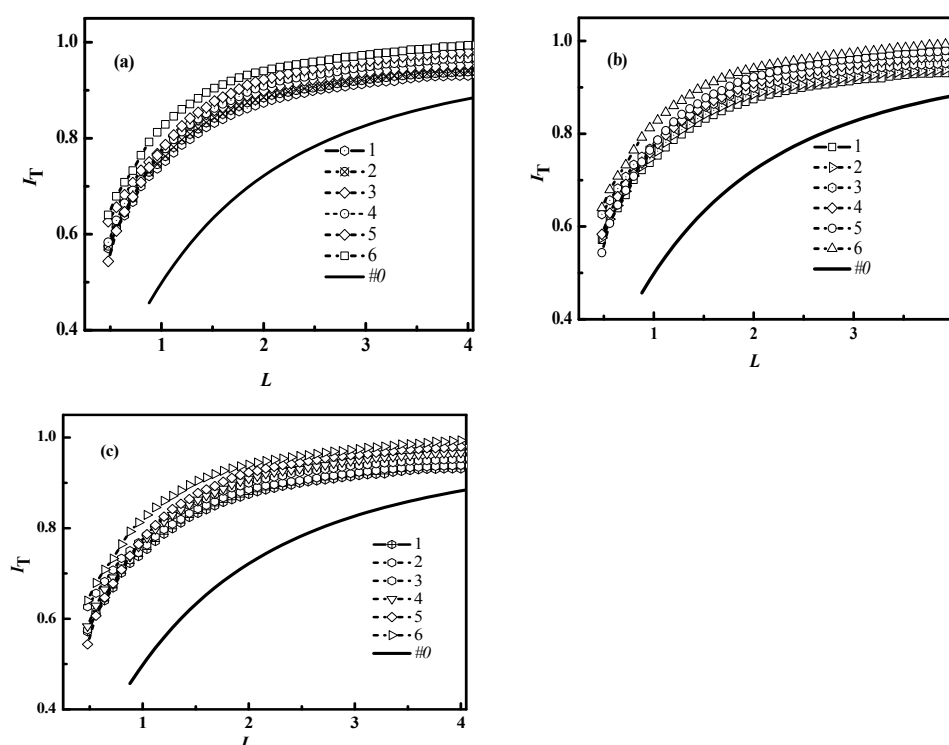

Fig. S6 Normalized SECM feedback approach curves for the approach of a Pt disk UME towards a NiO/P1 film in the dark (curve #0) and under illumination by red LED. (a) Photon flux density of LED in  $10^{-9}$  mol  $\text{cm}^{-2}$   $\text{s}^{-1}$  of normalized rate constants  $k$ : (1) 0.0012, (2) 0.0021, (3) 0.0048, (4) 0.0076, (5) 0.0116, (6) 0.0167. And  $k_{\text{eff}}$  ( $10^{-3}$  cm  $\text{s}^{-1}$ ): (1) 0.0477, (2) 0.0777, (3)

0.1024, (4) 0.1193, (5) 0.1317, (6) 0.1411. (b) NiO/CW1 film in the dark (curve #0) and under illumination by red LED. Photon flux density of LED in  $10^{-9} \text{ mol cm}^{-2} \text{ s}^{-1}$ , normalized rate constants  $k$ : (1) 0.0978, (2) 0.0995, (3) 0.1043, (4) 0.1095, (5) 0.1145, (6) 0.1212. And  $k_{\text{eff}}$  ( $10^{-3} \text{ cm s}^{-1}$ ): (1) 0.0145, (2) 0.0148, (3) 0.0155, (4) 0.0162, (5) 0.0171, (6) 0.0182. (c) NiO/CW2 film in the dark (curve #0) and under illumination by red LED. Photon flux density in  $10^{-9} \text{ mol cm}^{-2} \text{ s}^{-1}$ : (1) 4.19, (2) 6.81, (3) 9.44, (4) 12.06, (5) 13.11, (6) 14.68; normalized rate constants  $k$ : (1) 0.0375, (2) 0.0402, (3) 0.0464, (4) 0.0581, (5) 0.0614, (6) 0.0648. And  $k_{\text{eff}}$  ( $10^{-3} \text{ cm s}^{-1}$ ): (1) 0.054, (2) 0.059, (3) 0.069, (4) 0.086, (5) 0.091, (6) 0.096.

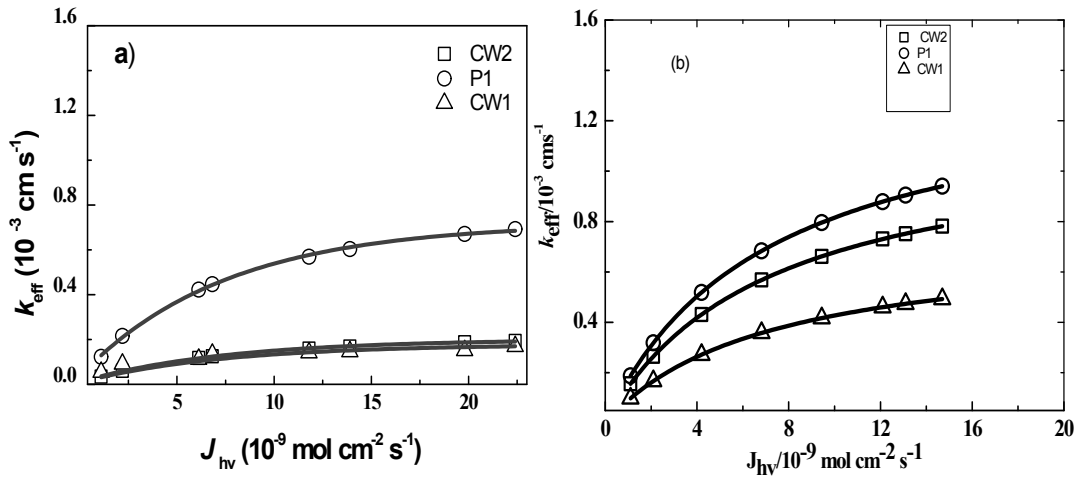

Fig. S7 Plot of experimental values of  $k_{\text{eff}}$  vs.  $J_{\text{hv}}$  ( $\lambda$ ). (a) Photon flux density of LED in  $10^{-9} \text{ mol cm}^{-2} \text{ s}^{-1}$  (1) 2.2, (2) 6.1, (3) 11.8, (4) 13.9, (5) 19.8, (6) 22.4. Scan rate,  $0.05 \text{ Vs}^{-1}$ , ET = 0.7 V, in electrolyte of 1mM (I<sup>-</sup>), normalized rate constants  $k$  (1) 0.009, (2) 0.013, (3) 0.025, (4) 0.036, (5) 0.05, (6) 0.099. And  $k_{\text{eff}} \times 10^{-3} \text{ cm s}^{-1}$  (1) 0.216, (2) 0.422, (3) 0.446, (4) 0.569, (5) 0.604, (6) 0.671. For NiO/CW1 normalized rate constant  $k$  (1) 0.0978, (2) 0.0995, (3) 0.1043, (4) 0.1095, (5) 0.1145, (6) 0.1212. And  $k_{\text{eff}} \times 10^{-3} \text{ cm s}^{-1}$  (1) 0.0145, (2) 0.111, (3) 0.141, (4) 0.149, (5) 0.166 (6) 0.171. For NiO/CW2 LED Photon flux density of LED in  $10^{-9} \text{ mol cm}^{-2} \text{ s}^{-1}$  (1) 4.19, (2) 6.81, (3) 9.44 (4) 12.06, (5) 13.11, (6) 14.68. Under illumination by red LED normalized rate constants  $k$  (1) 0.0978, (2) 0.0995, (3) 0.1043, (4) 0.1095, (5) 0.1145 (6) 0.1212. And  $k_{\text{eff}} \times 10^{-3} \text{ cm s}^{-1}$  (1) 0.145, (2) 0.148, (3) 0.155, (4) 0.162 (5) 0.171 (6) 0.182. (b) Photon flux density of red LED in  $10^{-9} \text{ mol cm}^{-2} \text{ s}^{-1}$  (1) 4.19, (2) 6.81, (3) 9.44 (4) 12.06, (5) 13.11, (6) 14.68. Normalized rate constants for NiO/P1  $k$  (1) 0.0012, (2) 0.0021, (3) 0.0048,

(4) 0.0076, (5) 0.0116, (6) 0.0167, and  $k_{\text{eff}} \times 10^{-3} \text{ cm s}^{-1}$  (1) 0.047, (2) 0.077, (3) 0.102, (4) 0.119, (5) 0.132, (6) 0.141. For the approach of a Pt disk UME towards a NiO/CW1 film in the dark (curve #0) and Normalized rate constants  $k$  (1) 0.0271, (2) 0.0331, (3) 0.0363, (4) 0.0391, (5) 0.0542, (6) 0.0598. And  $k_{\text{eff}} \times 10^{-3} \text{ cm s}^{-1}$  (1) 0.041, (2) 0.049, (3) 0.054, (4) 0.058, (5) 0.081, (6) 0.088. For NiO/CW2 film in the dark (curve #0) normalized rate constants  $k$  (1) 0.0375, (2) 0.0402 (3) 0.0464, (4) 0.0581, (5) 0.0614, (6) 0.0648. And  $k_{\text{eff}} \times 10^{-3} \text{ cm s}^{-1}$  (1) 0.056, (2) 0.059, (3) 0.069, (4) 0.086, (5) 0.091, (6) 0.096.

## References

1. R. Cornut and C. Lefrou, *J. Electroanal. Chem.*, 2008, **621**, 178-184.
2. J. L. Amphlett and G. Denuault, *J. Phys. Chem. B*, 1998, **102**, 9946-9951.
3. U. Tefashe; M. Rudolph, H. Miura, D. Schlettwein, G. Wittstock, *Phys. Chem. Chem. Phys.*, 2012, **14**, 7533-7542.
4. Y. Shen, U. Tefashe, K. Monomer, T. Loewenstein, D. Schlettwein, G. Wittstock, *Electrochemical Acta*, 2009, **55**, 458-464.
5. U. Tefashe, K. Nonomura, N. Vlachopoulos, A. Hagfeldt, G. Wittstock, *J. Phys. Chem. C* 2012, **116**, 4316-4323.
